# Supplementary material for: Modulation of MRSA virulence gene expression by the wall teichoic acid enzyme TarO
Source: Springer Nature journal article supplement (doi:10.1038/s41467-023-37310-5), 2023-03-22
Supplement: MOESM1 [file 41467_2023_37310_MOESM1_ESM.pdf]

# Supplementary Information for

## Modulation of MRSA virulence gene expression by the wall teichoic acid enzyme

### TarO

Yunfu Lu<sup>1,2,3#</sup>, Feifei Chen<sup>1,2,4#</sup>, Qingmin Zhao<sup>1,2,3</sup>, Qiao Cao<sup>1,2,4</sup>, Rongrong Chen<sup>1,2</sup>,  
Huiwen Pan<sup>1</sup>, Yanhui Wang<sup>1,2,3</sup>, Haixin Huang<sup>2</sup>, Ruimin Huang<sup>2,3</sup>, Qian Liu<sup>5</sup>, Min Li<sup>5</sup>,  
Taeok Bae<sup>6</sup>, Haihua Liang<sup>4,7\*</sup>, Lefu Lan<sup>1,2,3,4\*</sup>

<sup>#</sup>Y.L. and F.C. contributed equally to this work.

\*To whom correspondence should be addressed, Email: llan@ucas.ac.cn (L.L.) or  
lianghh@sustech.edu.cn (H. L)

### This file includes:

Figures S1 to S10

Tables S1 to S3

SI References

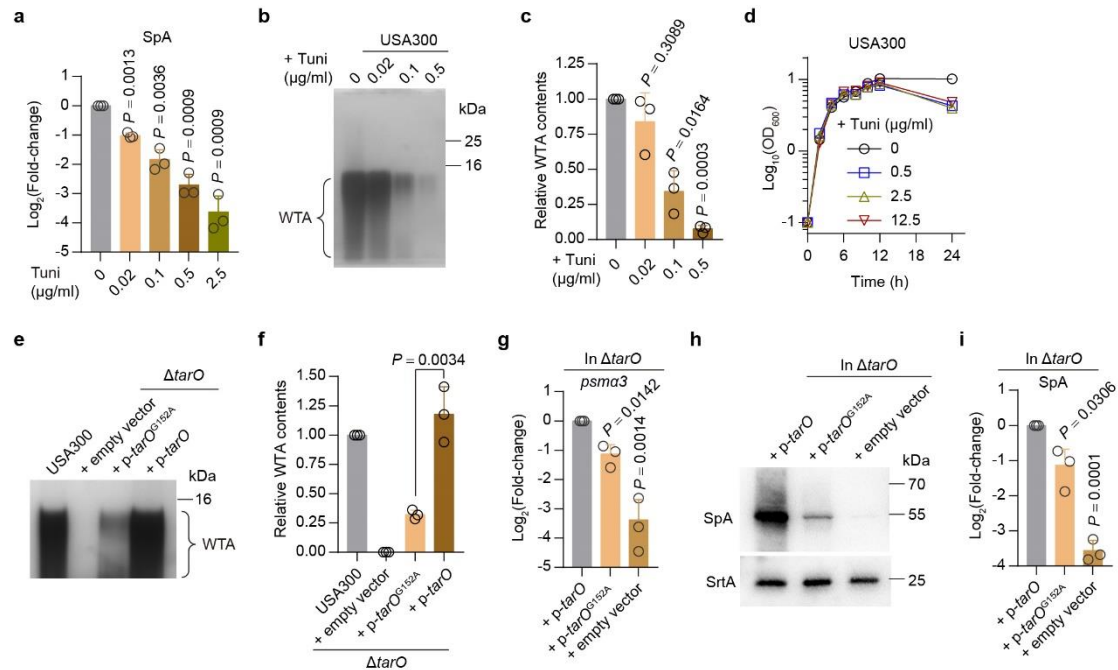

**Figure S1. WTA contents positively associate with the expression levels of *psmA* and *SpA* in USA300 LAC.** (a) Quantitative analysis of *SpA* in *S. aureus* strains grown in TSB medium supplemented with or without tunicamycin for 3 h. Data represent mean  $\pm$  SD from  $n = 3$  independent experiments. (b and c) Representative images of PAGE analysis (b) and quantitative analysis (c) of WTAs from USA300 LAC strain treated with tunicamycin for 3 h. Data represent mean  $\pm$  SD from  $n = 3$  independent experiments. (d) Effect of tunicamycin on the growth of USA300 LAC in TSB medium. Data represent mean  $\pm$  SD from  $n = 3$  biological replicates. (e and f) Representative images of WTA PAGE analysis (e) and quantitative analysis (f) of *S. aureus* strains grown in TSB medium for 3 h. Results are reported as fold changes compared with WT USA300. Data represent mean  $\pm$  SD from  $n = 3$  independent experiments. (g) qRT-PCR analysis of *psmA3* transcripts in *S. aureus* strains grown in TSB medium for 3 h, presented as relative expression levels (log2 fold changes) compared with the control sample (i.e.,  $\Delta tarO$  carrying p-*tarO*). Data represent mean  $\pm$  SD from three

independent experiments. (**h** and **i**) Representative images (**h**) and quantitative analysis (**i**) of Western blotting for SpA in *S. aureus* strains grown in TSB medium for 3 h. SrtA is a loading control, and the results are reported as relative expression levels (log<sub>2</sub> fold changes) compared with control sample (i.e.,  $\Delta tarO$  carrying p-*tarO*). Data represent mean  $\pm$  SD from  $n = 3$  independent experiments. In (**e**) to **i**), USA300 LAC harbors an empty pYJ335-1 vector as control,  $\Delta tarO$  carries either an empty pYJ335-1 vector or a p-*tarO* plasmid without (+ p-*tarO*) or with G152A missense mutation in *tarO* (+ p-*tarO*<sup>G152A</sup>). Statistical analysis was performed using two-tailed one-sample *t*-test (in **a** and **c**, with the untreated WT USA300 set to a fold change of 1; in **g** and **i**, with  $\Delta tarO$  carrying p-*tarO* set to a fold change of 1) and Student's two-tailed unpaired *t*-test (in **f**).

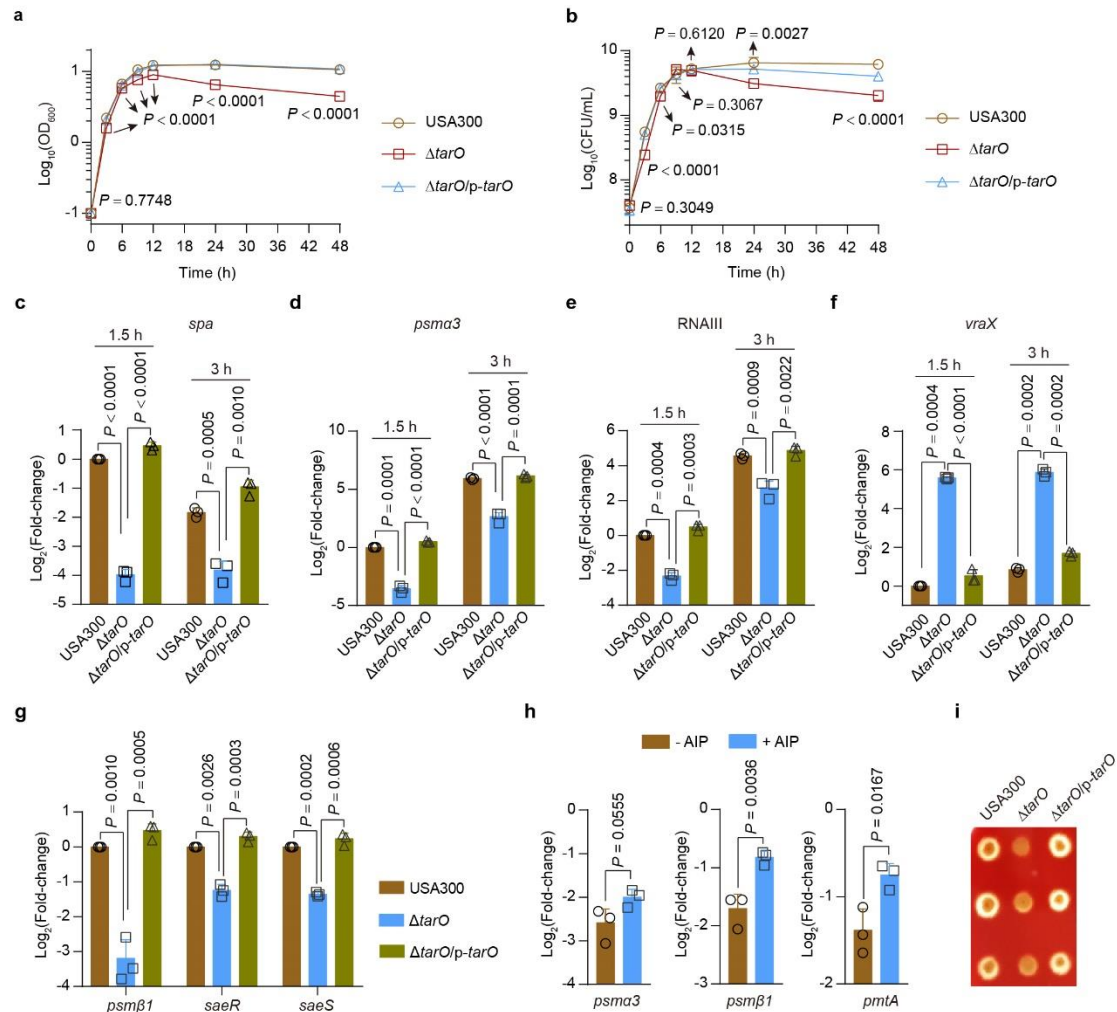

**Figure S2. Effect of *tarO* deletion on the growth, the expression of virulence gene,**

**and the hemolytic activity of USA300 LAC. (a)** Growth curve of *S. aureus* strains in

TSB medium. Data represent mean  $\pm$  SD from  $n = 4$  biological replicates. **(b)** Growth

of *S. aureus* strains measured by CFU/mL quantification. Data represent mean  $\pm$  SD

from  $n = 4$  biological replicates. CFU, colony forming unit. **(c to f)** qRT-PCR analysis of

*spa* **(c)**, *psmA3* **(d)**, *RNAlII* **(e)**, and *vraX* **(f)** in *S. aureus* strains grown in TSB medium

for 1.5 h and 3 h, presented as relative expression ( $\log_2$  fold changes) compared with

the control sample (WT USA300 at 1.5-h time point). Data represent mean  $\pm$  SD from

three independent experiments. **(g)** qRT-PCR analysis of *psmB1*, *saeR*, and *saeS* in *S.*

*aureus* strains grown in TSB medium for 3 h, presented as relative expressions ( $\log_2$

fold changes) compared with the control sample (WT USA300). Data represent mean  $\pm$  SD from three independent experiments. **(h)** Effect of the exogenous addition of AIP (1.5  $\mu$ M) on the expression levels of *psmA3*, *psm $\beta$ 1*, and *pmtA* in  $\Delta tarO$  mutant cultured in TSB medium for 3 h. Results presented as relative expression levels (log2 fold changes) compared with the control sample (WT USA300). Data from  $n = 3$  biological replicates are reported as the mean  $\pm$  SD. **(i)** Hemolytic activity of *S. aureus* strains on the sheep blood agar plate. In all panels, USA300 and  $\Delta tarO$  strains harbor an empty pYJ335-1 vector as control,  $\Delta tarO/p-tarO$  denotes the complemented strain of  $\Delta tarO$  (Table S2). Statistical analysis was performed using Student's two-tailed unpaired *t*-test (in **a** and **b**,  $\Delta tarO$  versus WT USA300 LAC; in **h**) and two-tailed one-sample *t*-test (in **c** to **f**, when compared with the WT USA300 at 1.5-h time point, which was set to a fold change of 1; in **g**, when compared with the WT USA300, which was set to a fold change of 1) or otherwise with Student's two-tailed unpaired *t*-test (in **c** to **g**).

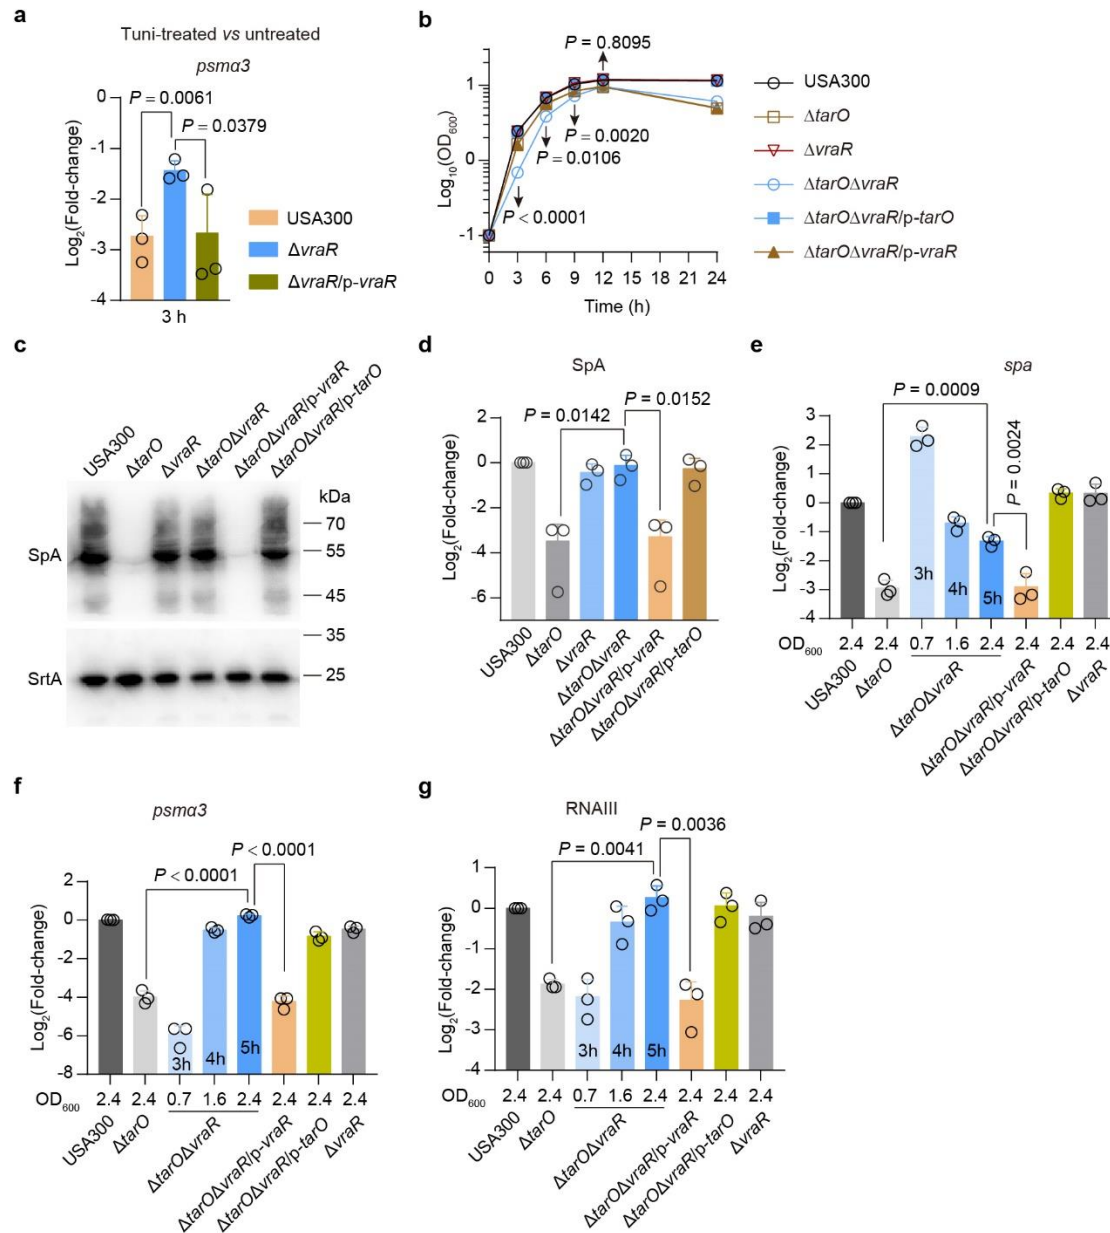

**Figure S3. VraR mediates TarO inhibition-induced changes in gene expression. (a)**

qRT-PCR analysis of the effect of tunicamycin (0.5 μg/ml) treatment on the expression of *psmα3* in *S. aureus* strains grown in TSB medium for 3 h. Results are showed as relative expressions (log2 fold changes) compared with the untreated control. Data represent mean ± SD from three independent experiments. Statistical analysis was performed using Student's two-tailed unpaired *t*-test. (b) Growth curve of *S. aureus* strains cultured in TSB medium. The cultures were shaken (250 rpm) at

37°C and the optical density at 600 nm was examined. Data represent mean  $\pm$  SD from  $n = 3$  biological replicates. Statistical analysis was performed using Student's two-tailed unpaired  $t$ -test ( $\Delta tarO\Delta vraR$  versus  $\Delta tarO$ ). **(c and d)** Representative images **(c)** and quantitative analysis **(d)** of western blotting for SpA in *S. aureus* strains grown in TSB medium for 3 h. SrtA is loading controls, and the results are reported as relative expression levels (log2 fold changes) compared with the WT USA300 control. Data represent mean  $\pm$  SD from  $n = 3$  independent experiments. Statistical analysis was performed using Student's two-tailed unpaired  $t$ -test. **(e to g)** qRT-PCR analysis of the expression of *spa* **(e)**, *psma3* **(f)** and RNAlII **(g)** in *S. aureus* strains grown in TSB medium. Results are showed as relative expressions (log2 fold changes) compared with the WT USA300 control. Data represent mean  $\pm$  SD from three independent experiments. Statistical analysis was performed using Student's two-tailed unpaired  $t$ -test. In all panels, USA300,  $\Delta tarO$ ,  $\Delta vraR$ , or  $\Delta tarO\Delta vraR$  mutant harbors an empty pYJ335-1 vector as control.

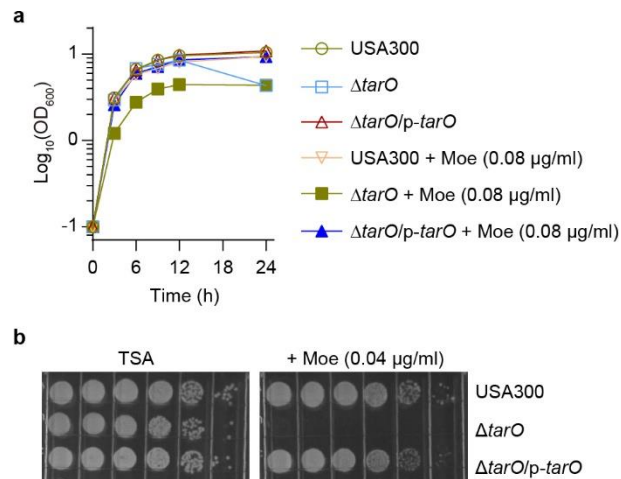

**Figure S4. Effect of *tarO* deletion on the susceptibility of USA300 LAC to**

**moenomycin. (a)** Growth curve of *S. aureus* strains in a 50-ml tube containing TSB

medium supplemented with or without moenomycin. The cultures were shaken (250

rpm) at 37°C and the optical density at 600 nm was examined. Data represent mean

± SD from n = 3 biological replicates. USA300 and  $\Delta tarO$  strains harbor an empty

pYJ335-1 vector as control,  $\Delta tarO/p-tarO$  denotes the complemented strain of  $\Delta tarO$

(Table S2). **(b)** The *tarO* null mutant strain shows decreased resistance to

moenomycin compared with either WT USA300 LAC strain (harboring pYJ335-1) or

the complemented strain of  $\Delta tarO$  (i.e.,  $\Delta tarO/p-tarO$ ). For this assay, the diluted

overnight cultures were grown in TSB medium at 37°C for 3 h, then serial 10-fold

dilutions of bacterial suspension were prepared and spotted (10  $\mu$ l per spot) onto

TSA agar plates supplemented with or without moenomycin, and the plates were

cultured at 30 °C for 24 h. Images are representative of two independent

experiments.



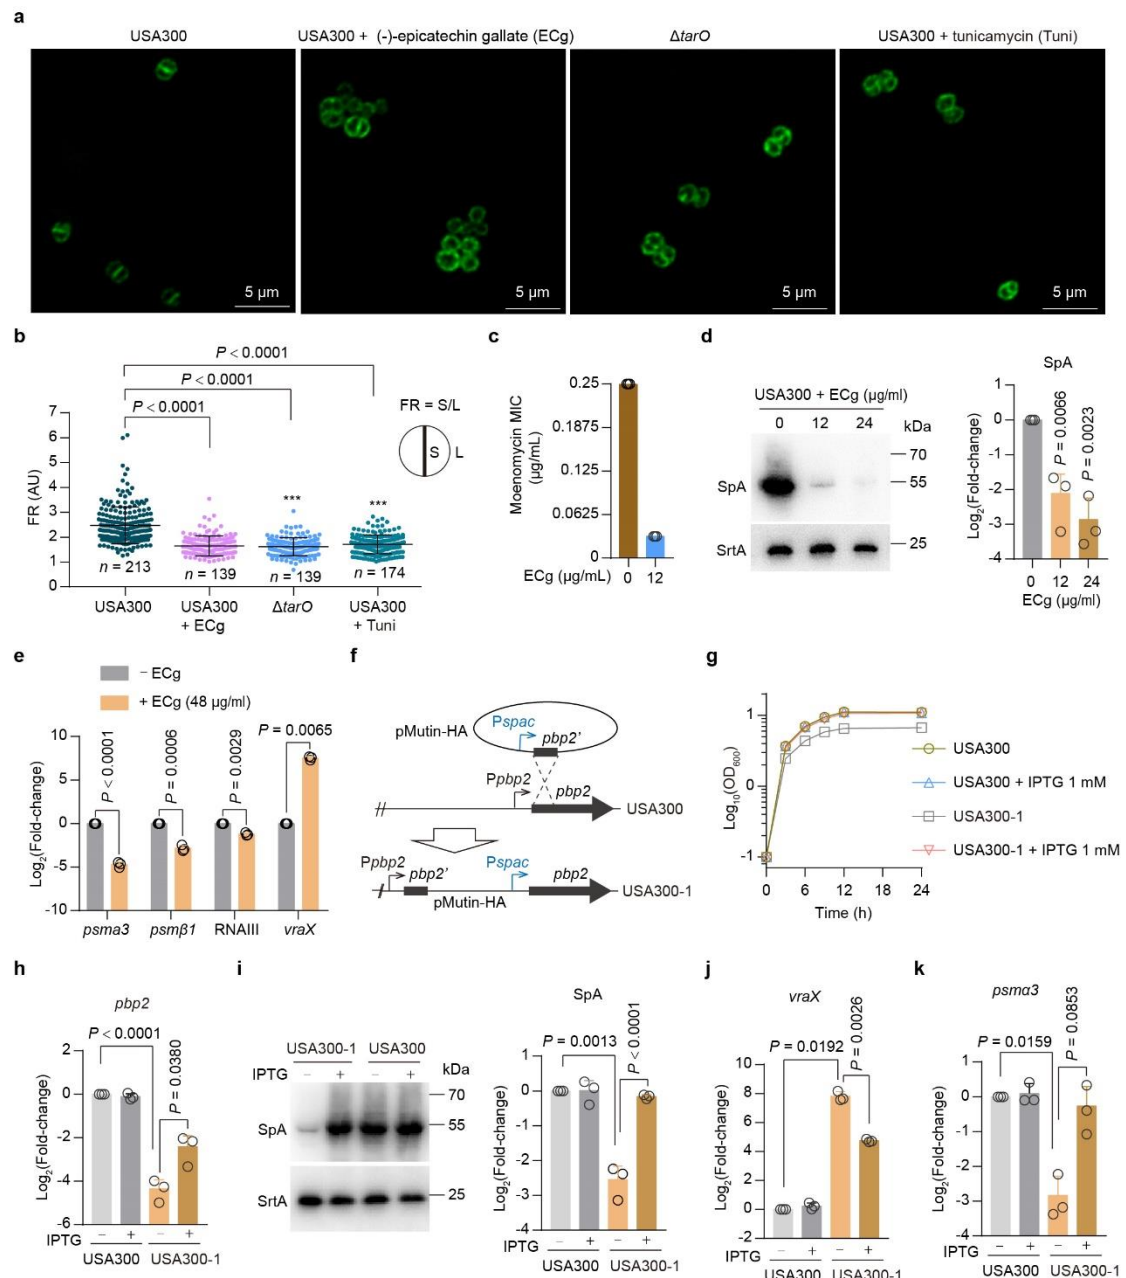

**Figure S5. Role of PBP2 in the expression of virulence genes in USA300.** (a) Effect of ECg treatment, *tarO* deletion, or tunicamycin treatment on the septal localization of GFP-PBP2. The scale bar is 5  $\mu\text{m}$ . (b) Quantitative analysis of GFP-PBP2 fluorescence at septum (S) *versus* lateral (L) membrane. Data represent mean  $\pm$  SD. (c) Minimum inhibitory concentrations (MIC) of moenomycin against WT USA 300 LAC in the absence or presence of ECg. (d) Representative images (*left panel*) and quantitative analysis (*right panel*) of SpA in WT USA300 strain grown in TSB medium

supplemented with ECg for 3 h. SrtA is loading controls. Data represent mean  $\pm$  SD  
from  $n = 3$  independent experiments. **(e)** Effect of ECg treatment on expression of  
*psma3*, *psm61*, RNAlII, and *vraX*. Data represent mean  $\pm$  SD from three independent  
experiments. **(f)** Schematic of construction of *pbp2*-depleted mutant USA300-1. **(g)**  
Growth curves of USA300 and USA300-1 cultured in TSB medium supplemented with  
or without IPTG. **(h)** qRT-PCR analysis of *pbp2* transcripts in *S. aureus* strains grown in  
TSB medium supplemented with (+) or without (-) IPTG (1 mM) for 3 h. Data  
represent mean  $\pm$  SD from three independent experiments. **(i)** Representative images  
(left panel) and quantitative analysis (right panel) of Western blotting for SpA in *S.*  
*aureus* grown in TSB medium supplemented with (+) or without (-) IPTG (1 mM) for 3  
h. SrtA is loading controls. Data represent mean  $\pm$  SD from  $n = 3$  independent  
experiments. **(j and k)** Relative expression levels of *vraX* (**j**) and *psma3* (**k**) in *S. aureus*  
strains grown in TSB medium supplemented with (+) or without (-) IPTG (1 mM) for 3  
h. Data represent mean  $\pm$  SD from three independent experiments. Statistical  
analysis was performed using two-tailed one-sample *t*-test (in **d** and **e**, when  
compared with the untreated WT USA300, which was set to a fold change of 1; in **h**  
to **k**, when compared with the WT USA300 in the absence of IPTG, which was set to a  
fold change of 1) or otherwise with Student's two-tailed unpaired *t*-test (in **b**, and **h**  
to **k**).

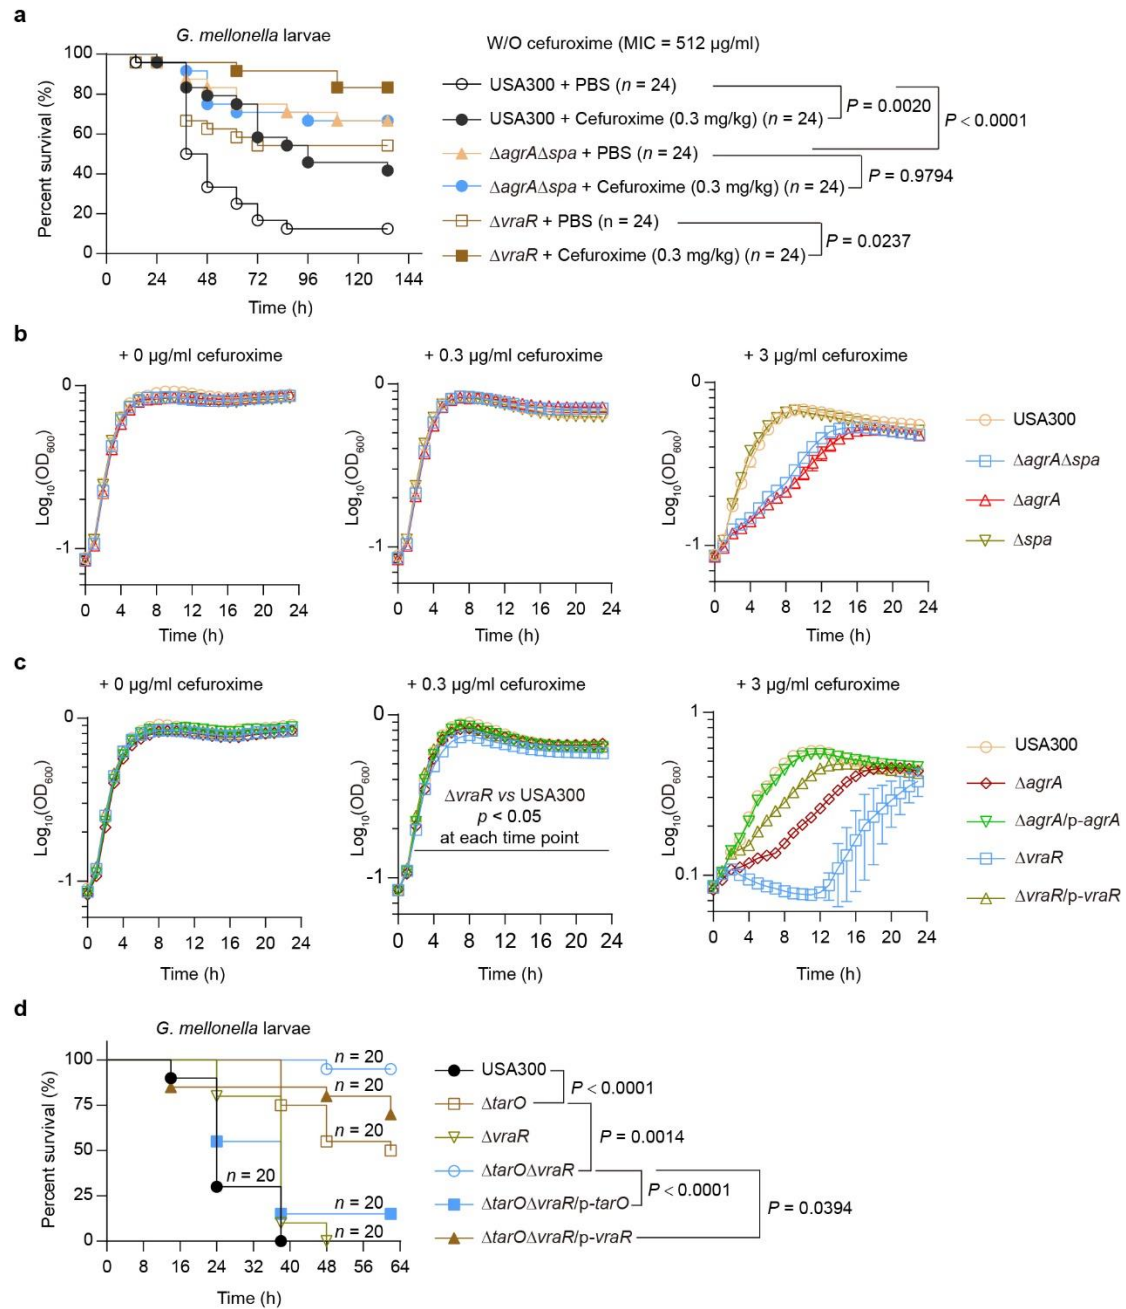

**Figure S6. The virulence of *S. aureus* strains against *G. mellonella* larvae and the bacterial growth curves. (a) Effect of cefuroxime on the survival rates of *G. mellonella* larvae infected by indicated *S. aureus* strains. *n* indicates the number of *G. mellonella* larvae used. Statistical analysis was performed using log-rank test. (b and c) The growth curve of *S. aureus* strains cultured in 96-well microtitre plate at 37°C. Overnight cultures were diluted to an OD<sub>600</sub> ≈ 0.05 in fresh TSB with or without**

cefuroxime (as indicated). Then, 200  $\mu$ l aliquot of the sample was distributed to a 96-well plate, and 50  $\mu$ l saxoline was added to each well to prevent evaporation. OD<sub>600</sub> was monitored at 37°C using a Synergy 2 Multi-Mode Microplate Reader (Biotek) with 1 h interval. In (c), WT USA300,  $\Delta$ agrA or  $\Delta$ vraR harbor an empty pYJ335-1 vector as control.  $\Delta$ agrA/p-agrA denotes  $\Delta$ agrA mutant carrying plasmid p-agrA;  $\Delta$ vraR/p-vraR denotes  $\Delta$ vraR mutant carrying plasmid p-vraR. \**P* < 0.05 by Student's two-tailed unpaired *t*-test ( $\Delta$ vraR versus either WT USA300 or  $\Delta$ vraR/p-vraR). (d) Survival rates of *G. mellonella* larvae upon infection by indicated *S. aureus* strains. *n* indicates the number of *G. mellonella* larvae used. Statistical analysis was performed using log-rank test. WT USA300,  $\Delta$ tarO,  $\Delta$ vraR, and  $\Delta$ tarO $\Delta$ vraR harbor an empty pYJ335-1 vector as control.  $\Delta$ tarO $\Delta$ vraR/p-tarO denotes  $\Delta$ tarO $\Delta$ vraR mutant carrying plasmid p-tarO;  $\Delta$ tarO $\Delta$ vraR/p-vraR denotes  $\Delta$ tarO $\Delta$ vraR mutant carrying plasmid p-vraR (Table S2).

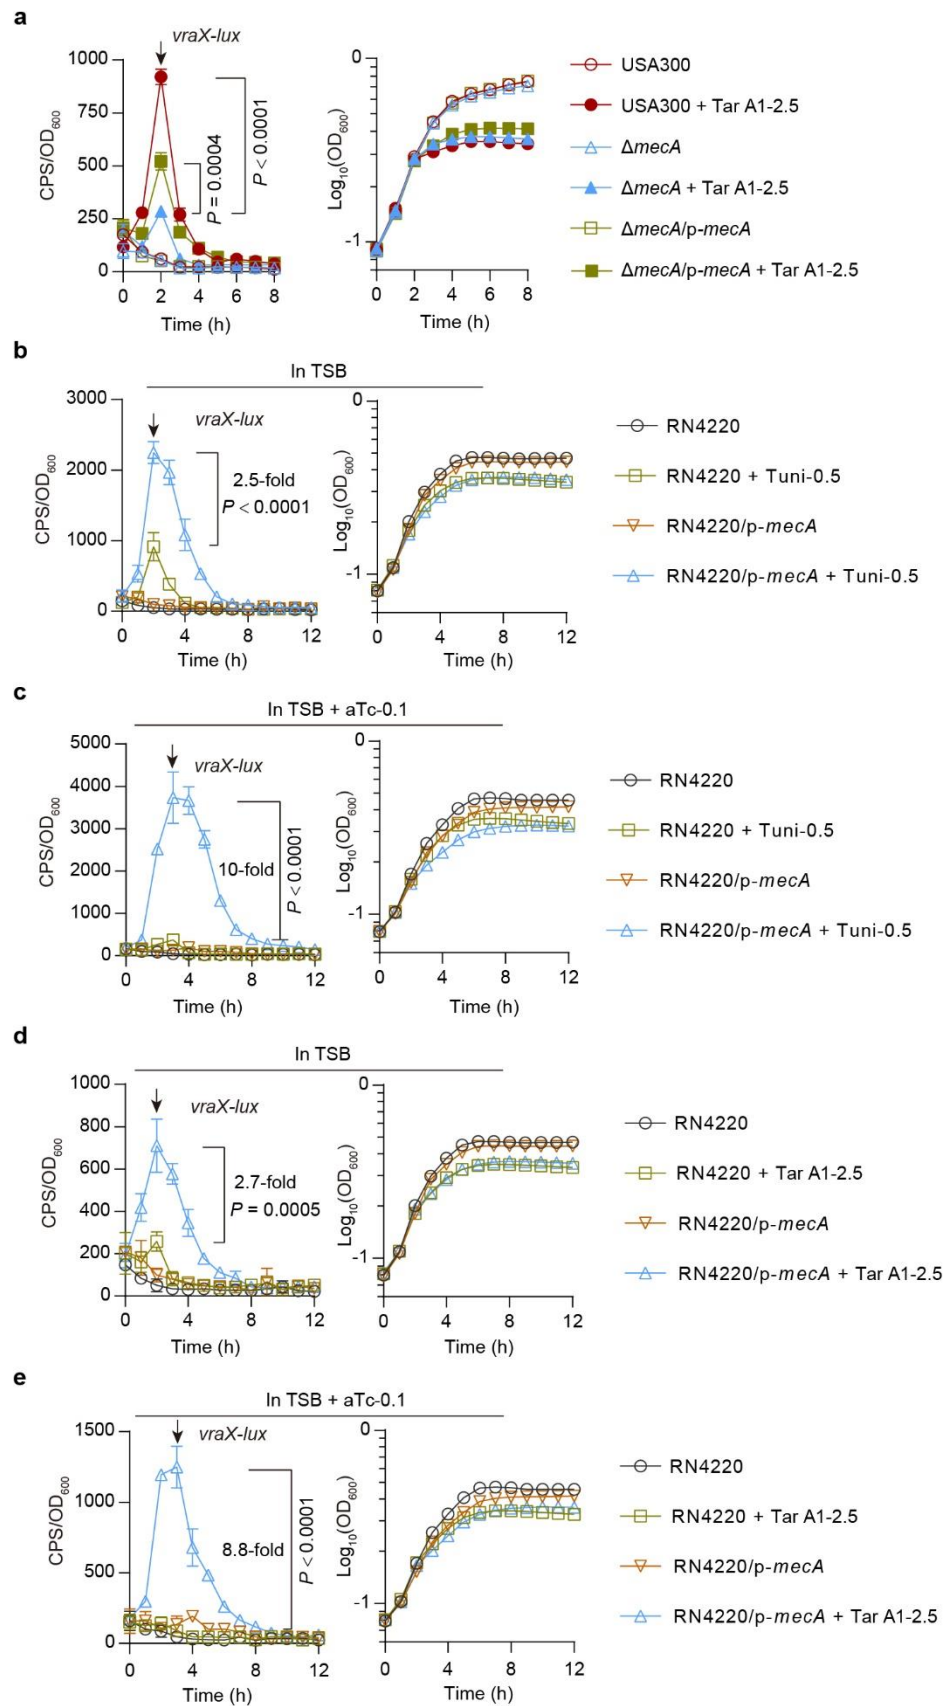

**Figure S7. Role of *mecA* in mediating the induction of *vraX-lux* upon TarO**

**inhibition. (a) Effect of *mecA* deletion on the expression of *vraX-lux* in USA300 LAC**

grown in TSB medium supplemented with either DMSO vehicle control or TarO inhibitor Tarocin A1. Tar A1-2.5, Tarocin A1 at a final concentration of 2.5 µg/ml. Data from  $n = 4$  biological replicates are reported as the mean  $\pm$  SD. Statistical analysis was performed using Student's two-tailed unpaired  $t$ -test ( $\Delta mecA$  versus either WT USA300 LAC or  $\Delta mecA/p-mecA$  when cultured in TSB medium in the presence of Tarocin A1 for 2 h indicated by arrow). **(b and c)** Expression of *vraX-lux* in RN4220 derivatives grown in TSB medium **(b)** or in TSB medium supplemented with aTc **(c)** in the presence or absence of tunicamycin. aTc-0.1, aTc at a final concentration of 0.1 µg/ml; Tuni-0.5, tunicamycin at a final concentration of 0.5 µg/ml. Data from  $n = 4$  biological replicates are reported as the mean  $\pm$  SD. Statistical analysis was performed using Student's two-tailed unpaired  $t$ -test (RN4220/ $p-mecA$  versus RN4220 when cultured in the presence of tunicamycin for 2 or 3 h, as indicated by the arrows). **(d and e)** Expression of *vraX-lux* in RN4220 derivatives grown in TSB medium **(d)** or in TSB medium supplemented with aTc **(e)** in the presence or absence of Tarocin A1. aTc-0.1, aTc at a final concentration of 0.1 µg/ml; Tar A1-2.5, Tarocin A1 at a final concentration of 2.5 µg/ml. Data from  $n = 4$  biological replicates are reported as the mean  $\pm$  SD. Statistical analysis was performed using Student's two-tailed unpaired  $t$ -test (RN4220/ $p-mecA$  versus RN4220 when cultured in the presence of Tarocin A1 for 2 or 3 h, as indicated by the arrows). In **(a)** to **(f)**, USA300,  $\Delta mecA$  or RN4220 harbors an empty pYJ335 vector as control.

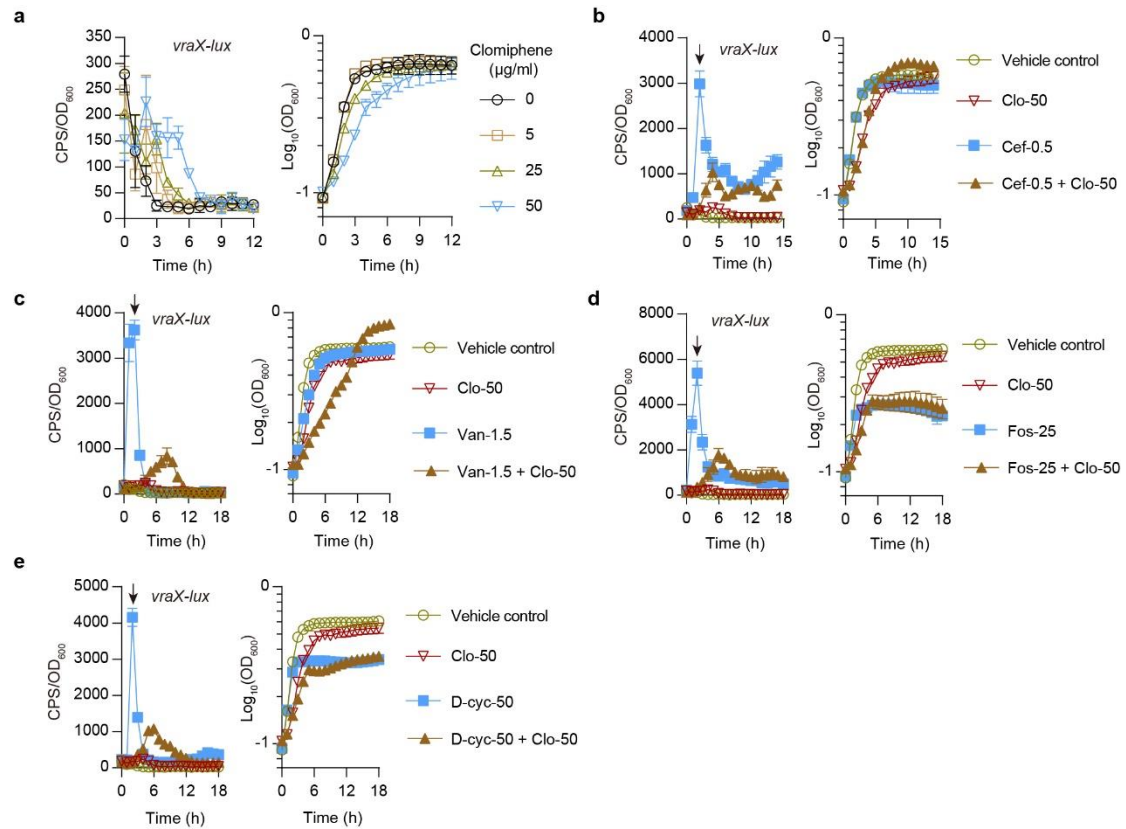

**Figure S8. Effect of clomiphene on the expression of *vraX-lux*.** (a) Effect of clomiphene treatment on the expression of *vraX-lux* in WT USA300 LAC strain. Data from  $n = 3$  biological replicates are reported as the mean  $\pm$  SD. (b to e) Effect of clomiphene treatment on the *vraX-lux* induction by cefuroxime (b), vancomycin (c), fosfomycin (d), and D-cycloserine (e). Cef-0.5, cefuroxime at a final concentration of 0.5  $\mu$ g/ml; Van-1.5, vancomycin at a final concentration of 1.5  $\mu$ g/ml; Fos-25, fosfomycin at a final concentration of 25  $\mu$ g/ml; D-cyc-50, D-cycloserine at a final concentration of 50  $\mu$ g/ml; clomiphene-50, clomiphene at a final concentration of 50  $\mu$ g/ml. Data from  $n = 4$  biological replicates are reported as the mean  $\pm$  SD. Arrow indicates the maximal induction of *vraX-lux* under the testing conditions.

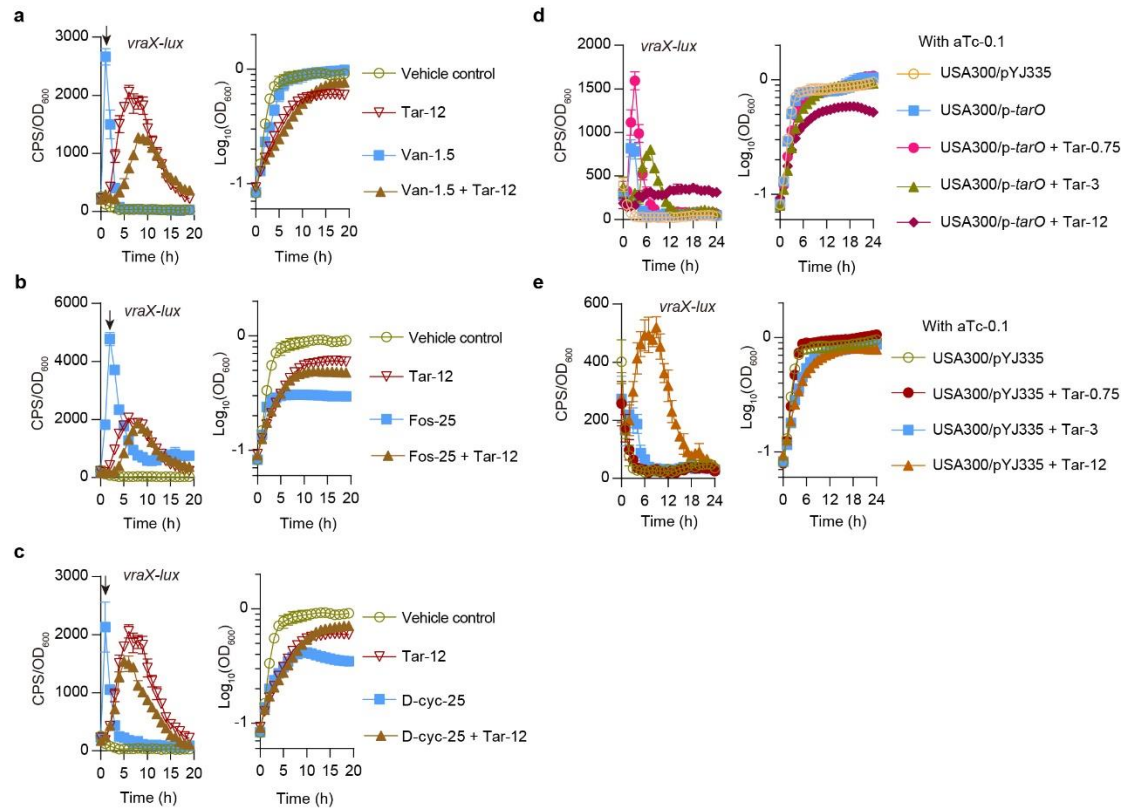

**Figure S9. Effect of targocil or *tarO* overexpression on the expression of *vraX-lux*.** (a to c) Effect of targocil treatment on the *vraX-lux* induction in USA300 LAC strain by vancomycin (a), fosfomycin (b), and D-cycloserine (c). Van-1.5, vancomycin at a final concentration of 1.5  $\mu\text{g/ml}$ ; Fos-25, fosfomycin at a final concentration of 25  $\mu\text{g/ml}$ ; D-cyc-25, D-cycloserine at a final concentration of 25  $\mu\text{g/ml}$ ; Tar-12, targocil at a final concentration of 12  $\mu\text{g/ml}$ . Data from  $n = 4$  biological replicates are reported as the mean  $\pm$  SD. (d and e) Effect of *tarO* overexpression on the expression of *vraX-lux* in USA300 LAC derivatives grown in TSB medium supplemented with or without targocil in the presence of anhydrotetracycline (aTc-0.1, anhydrotetracycline at a final concentration of 0.1  $\mu\text{g/ml}$ ) that induces the tetracycline-inducible *xyl/tetO* promoter in the pYJ335 plasmid. The effect of targocil on the expression of *vraX-lux* in USA300/pYJ335 strain is also shown in (e). Tar-0.75, Tar-3, and Tar-12 denote targocil



219 at a final concentration of 0.75, 3, and 12  $\mu\text{g/ml}$ , respectively. Data from  $n = 4$

220 biological replicates are reported as the mean  $\pm$  SD.

221

222

223

224

225

226

227

228

229

230

231

232

233

234

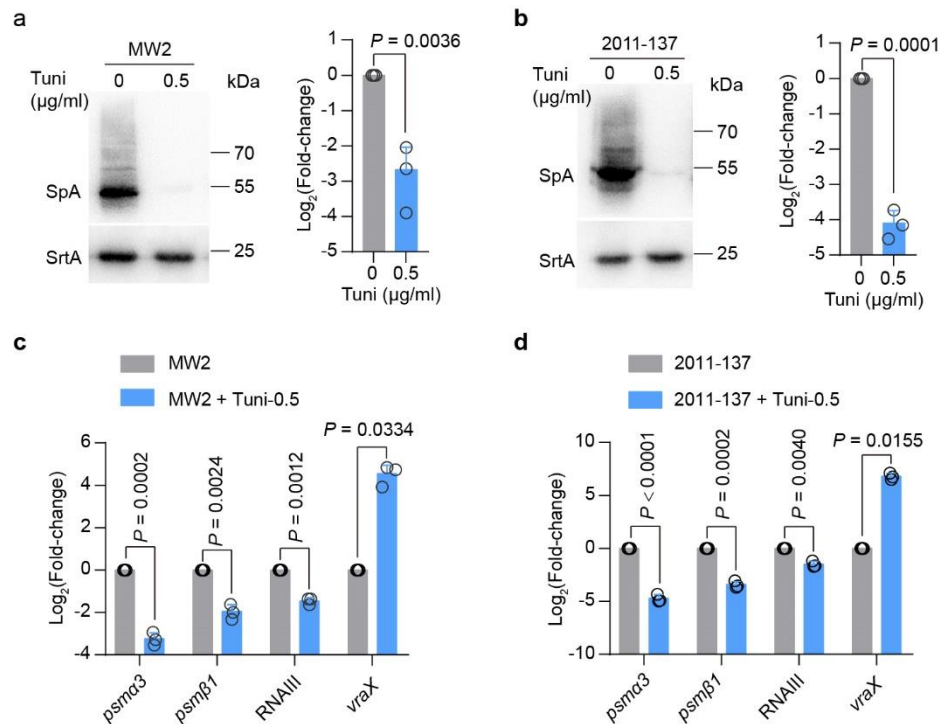

**Figure S10. Effect of tunicamycin treatment on virulence gene expression in CA-MRSA isolates USA400 MW2 and 2011-137.** (a and b) Representative images (left panel) and quantitative analysis (right panel) of Western blotting for SpA in USA400 MW2 (a) and 2011-137 (b) strains grown in TSB medium supplemented with or without tunicamycin (Tuni). Sortase A (SrtA) is a loading control. Western blot band intensity of SpA was normalized to the intensities obtained with SrtA, and the results are reported as log<sub>2</sub> fold changes with the untreated control sample was set to a fold change of 1. Data represent mean  $\pm$  SD from  $n = 3$  independent experiments. Statistical analysis was performed using two-tailed one-sample  $t$ -test. (c and d) qRT-PCR analysis of *psmA3*, *psmβ1*, *RNAIII*, and *vraX* transcripts in USA400 MW2 (c) and 2011-137 (d) strains grown in TSB medium supplemented with or without tunicamycin (0.5 µg/ml), presented as relative expression (log<sub>2</sub> fold changes) compared with the untreated controls. Data represent mean  $\pm$  SD from three

independent experiments. Statistical analysis was performed using two-tailed one-sample *t*-test.

**Table S1. Effect of tunicamycin on the antibiotic resistance of CA-MRSA strains**

| Antibiotics | USA300<br>(-/+) <sup>a</sup> | FC <sup>b</sup> | USA400<br>(-/+) <sup>a</sup> | FC <sup>b</sup> | 2011-137<br>(-/+) <sup>a</sup> | FC <sup>b</sup> |
|-------------|------------------------------|-----------------|------------------------------|-----------------|--------------------------------|-----------------|
| Cefotaxime  | 64/4                         | 16              | 32/4                         | 8               | 32/4                           | 8               |
| Cefuroxime  | 512/4                        | 128             | 32/2                         | 16              | 8/1                            | 8               |
| Ceftizoxime | >512/16                      | >32             | 512/8                        | 64              | 128/4                          | 32              |
| Moenomycin  | 0.25/0.0625                  | 4               | 0.125/0.03125                | 4               | 0.25/0.0625                    | 4               |

<sup>a</sup>Number indicates the minimum inhibitory concentrations (MIC) (µg/ml), “-” and “+” respectively indicates in the absence and presence of tunicamycin (0.5 µg/ml). <sup>b</sup>FC, MIC fold-change in the absence of tunicamycin relative to those in the presence of tunicamycin. Cefotaxime, cefuroxime, and ceftizoxime bind preferentially to PBP2; moenomycin is a GTase inhibitor.

**Table S2. Plasmids and strains used in this study.**

| Strains or plasmids                   | Relevant genotype or characteristic                                                                                                               | Source     |
|---------------------------------------|---------------------------------------------------------------------------------------------------------------------------------------------------|------------|
| Plasmids                              |                                                                                                                                                   |            |
| pCL- <i>lacZ</i>                      | <i>E. coli</i> - <i>S. aureus</i> shuttle cloning vector, single-copy integration vector in <i>S. aureus</i>                                      | (1)        |
| pCL- <i>lux</i>                       | pCL- <i>lacZ</i> derivative carrying <i>luxABCDE</i>                                                                                              | this study |
| pCL- <i>psma</i> - <i>lacZ</i>        | pCL- <i>lacZ</i> derivative carrying <i>psma</i> promoter                                                                                         | this study |
| pCL- <i>psma</i> - <i>lux</i>         | pCL- <i>lux</i> derivative carrying <i>psma</i> promoter                                                                                          | this study |
| pCL- <i>vraX</i> - <i>lacZ</i>        | pCL- <i>lacZ</i> derivative carrying <i>vraX</i> promoter                                                                                         | this study |
| pCL- <i>vraX</i> - <i>lux</i>         | pCL- <i>lux</i> derivative carrying <i>vraX</i> promoter                                                                                          | this study |
| pYJ335                                | <i>E. coli</i> - <i>S. aureus</i> shuttle vector, Cm <sup>r</sup> , Erm <sup>r</sup>                                                              | (2)        |
| pYJ335-1                              | A modified pYJ335 plasmid containing <i>AscI</i> and <i>PspOMI</i> restriction enzyme sites followed by the blunt-end <i>EcoRV</i> site of pYJ335 | this study |
| p- <i>tarO</i>                        | pYJ335-1 derivative carrying <i>tarO</i> in the downstream of the <i>xyl/tetO</i> promoter                                                        | this study |
| p- <i>tarO</i> <sup>G152A</sup>       | p- <i>tarO</i> derivative carrying <i>tarO</i> which has alanine substitution mutant at the site of glycine residue 152                           | this study |
| p- <i>vraR</i>                        | pYJ335-1 derivative carrying <i>vraR</i> in the downstream of the <i>xyl/tetO</i> promoter                                                        | this study |
| p- <i>sgtB</i>                        | pYJ335 derivative carrying <i>sgtB</i> in the downstream of the <i>xyl/tetO</i> promoter                                                          | this study |
| p- <i>murJ</i>                        | pYJ335 derivative carrying <i>murJ</i> in the downstream of the <i>xyl/tetO</i> promoter                                                          | this study |
| p- <i>mecA</i>                        | pYJ335 derivative carrying <i>mecA</i> in the downstream of the <i>xyl/tetO</i> promoter                                                          | this study |
| p- <i>agrA</i>                        | pYJ335-1 derivative carrying <i>agrA</i> in the downstream of the <i>xyl/tetO</i> promoter                                                        | this study |
| pET28a                                | T7 <i>lac</i> promoter-operator, N-terminal His tag, Kan <sup>r</sup>                                                                             | Novagen    |
| pET28a-His <sub>6</sub> - <i>vraR</i> | pET28a derivative carrying <i>vraR</i>                                                                                                            | this study |
| pKOR1                                 | Gene replacement vector for <i>S. aureus</i> genes, Amp <sup>r</sup> , Cm <sup>r</sup>                                                            | (3)        |
| pKOR1:: <i>tarO</i>                   | pKOR1 derivative, for deletion of <i>tarO</i>                                                                                                     | this study |

|                                                |                                                                                                                                                              |            |
|------------------------------------------------|--------------------------------------------------------------------------------------------------------------------------------------------------------------|------------|
| pKOR1:: <i>vraR</i>                            | pKOR1 derivative, for deletion of <i>vraR</i>                                                                                                                | this study |
| pKOR1:: <i>mecA</i>                            | pKOR1 derivative, for deletion of <i>mecA</i>                                                                                                                | this study |
| pMutin-HA                                      | A suicide vector for introducing mutation in <i>S. aureus</i> via a single recombination event                                                               | (4)        |
| pMutin-HA- <i>pbp2'</i>                        | pMutin-HA derivative carrying a DNA fragment covering the ribosome binding site region and the first 630 bp (-20 to + 630 of the start codon) of <i>pbp2</i> | this study |
| p- <i>gfp-pbp2</i>                             | pYJ335-1 derivative carrying <i>gfp-pbp2</i> fusion in the downstream of the <i>xyl/tetO</i> promoter                                                        | this study |
| <i>S. aureus</i>                               |                                                                                                                                                              |            |
| RN4220                                         | Derivative of 8325-4 that accepts plasmids                                                                                                                   | (5)        |
| USA300 LAC                                     | A CA-MRSA USA300 isolate, sequence type 8 (ST8)                                                                                                              | (6)        |
| USA400 MW2                                     | A CA-MRSA USA300 isolate; ST1                                                                                                                                | (6)        |
| 2011-137                                       | A clinic isolate of CA-MRSA lineage ST59                                                                                                                     | (7)        |
| JE2                                            | <i>S. aureus</i> LAC cured of all 3 native plasmids; Erm <sup>s</sup>                                                                                        | (8)        |
| JE2:: <i>vraX-lacZ</i>                         | JE2 strain carrying an integration vector pCL- <i>vraX-lux</i>                                                                                               | this study |
| USA300:: <i>psma-lacZ</i>                      | USA300 LAC carrying an integration vector pCL- <i>psma-lacZ</i>                                                                                              | this study |
| USA300:: <i>psma-lux</i>                       | USA300 LAC carrying an integration vector pCL- <i>psma-lux</i>                                                                                               | this study |
| USA300:: <i>vraX-lacZ</i>                      | USA300 LAC carrying an integration vector pCL- <i>vraX-lacZ</i>                                                                                              | this study |
| USA300:: <i>vraX-lux</i>                       | USA300 LAC carrying an integration vector pCL- <i>vraX-lux</i>                                                                                               | this study |
| RN4220:: <i>vraX-lux</i>                       | RN4220 carrying an integration vector pCL- <i>vraX-lux</i>                                                                                                   | this study |
| $\Delta tarO$                                  | <i>tarO</i> deletion mutant of USA300 LAC                                                                                                                    | this study |
| USA300/pYJ335-1                                | USA300 LAC carrying plasmid pYJ335-1                                                                                                                         | this study |
| $\Delta tarO$ /pYJ335-1                        | $\Delta tarO$ carrying plasmid pYJ335-1                                                                                                                      | this study |
| $\Delta tarO$ /p- <i>tarO</i>                  | $\Delta tarO$ carrying plasmid p- <i>tarO</i>                                                                                                                | this study |
| $\Delta tarO$ /p- <i>tarO</i> <sup>G152A</sup> | $\Delta tarO$ carrying plasmid p- <i>tarO</i> <sup>G152A</sup>                                                                                               | this study |
| $\Delta mecA$                                  | <i>mecA</i> deletion mutant of USA300 LAC                                                                                                                    | this study |
| $\Delta mecA$ :: <i>vraX-lux</i>               | $\Delta mecA$ carrying an integration vector pCL- <i>vraX-lux</i>                                                                                            | this study |
| $\Delta vraR$                                  | <i>vraR</i> deletion mutant of USA300 LAC                                                                                                                    | this study |
| $\Delta vraR$ /pYJ335-1                        | $\Delta vraR$ carrying plasmid pYJ335-1                                                                                                                      | this study |

|                                 |                                                                                                                     |                  |
|---------------------------------|---------------------------------------------------------------------------------------------------------------------|------------------|
| $\Delta vraR::psma\alpha-lux$   | $\Delta vraR$ carrying an integration vector pCL- <i>psma<math>\alpha</math>-lux</i>                                | this study       |
| $\Delta vraR::vraX-lux$         | $\Delta vraR$ carrying an integration vector pCL- <i>vraX-lux</i>                                                   | this study       |
| $\Delta vraR/p-vraR$            | $\Delta vraR$ carrying plasmid p- <i>vraR</i>                                                                       | this study       |
| $\Delta vraR::vraX-lacZ$        | $\Delta vraR$ carrying an integration vector pCL- <i>vraX-lacZ</i>                                                  | this study       |
| USA300-1                        | USA300 LAC carrying pMutin-HA- <i>pbp2'</i>                                                                         | this study       |
| USA300/p- <i>gfp-pbp2</i>       | USA300 LAC carrying p- <i>gfp-pbp2</i>                                                                              | this study       |
| $\Delta tarO/p-gfp-pbp2$        | $\Delta tarO$ carrying p- <i>gfp-pbp2</i>                                                                           | this study       |
| $\Delta mecA/p-gfp-pbp2$        | $\Delta mecA$ carrying p- <i>gfp-pbp2</i>                                                                           | this study       |
| $\Delta agrA$                   | <i>agrA</i> deletion mutant of USA300 LAC                                                                           | this study       |
| $\Delta spa$                    | <i>spa</i> deletion mutant of USA300 LAC                                                                            | this study       |
| $\Delta agrA\Delta spa$         | <i>agrA</i> and <i>spa</i> double-deletion mutant of USA300 LAC                                                     | this study       |
| JE2/pYJ335                      | JE2 carrying plasmid pYJ335                                                                                         | this study       |
| <i>sgtB</i>                     | JE2 mutant with mariner-based transposon insertion at 562 bp after the start codon of <i>sgtB</i> .                 | laboratory stock |
| <i>sgtB::vraX-lux</i>           | <i>sgtB</i> mutant carrying an integration vector pCL- <i>vraX-lux</i>                                              | This study       |
| <i>sgtB/pYJ335</i>              | <i>sgtB</i> carrying plasmid pYJ335                                                                                 | this study       |
| <i>sgtB/p-sgtB</i>              | <i>sgtB</i> carrying plasmid p- <i>sgtB</i>                                                                         | laboratory stock |
| USA300:: <i>vraX-lux/pYJ335</i> | USA300:: <i>vraX-lux</i> carrying plasmid pYJ335                                                                    | this study       |
| USA300:: <i>vraX-lux/p-murJ</i> | USA300:: <i>vraX-lux</i> carrying plasmid p- <i>murJ</i>                                                            | this study       |
| $\Delta mecA::vraX-lux/pYJ335$  | $\Delta mecA::vraX-lux$ carrying plasmid pYJ335                                                                     | this study       |
| $\Delta mecA::vraX-lux/p-mecA$  | $\Delta mecA::vraX-lux$ carrying plasmid p- <i>mecA</i>                                                             | this study       |
| RN4220:: <i>vraX-lux/pYJ335</i> | RN4220:: <i>vraX-lux</i> carrying plasmid pYJ335                                                                    | this study       |
| RN4220:: <i>vraX-lux/p-murJ</i> | RN4220:: <i>vraX-lux</i> carrying plasmid p- <i>murJ</i>                                                            | this study       |
| RN4220:: <i>vraX-lux/p-mecA</i> | RN4220:: <i>vraX-lux</i> carrying plasmid p- <i>mecA</i>                                                            | this study       |
| DH5 $\alpha$                    | for DNA cloning                                                                                                     | laboratory stock |
| BL21 star (DE3)                 | F <sup>-</sup> <i>ompT hsdS<sub>B</sub> (r<sub>B</sub><sup>-</sup> m<sub>B</sub><sup>-</sup>) gal dcm met</i> (DE3) | laboratory stock |

261 Amp<sup>r</sup>, ampicillin resistance; Cm<sup>r</sup>, chloramphenicol resistance; Erm<sup>r</sup>, erythromycin  
262 resistance; Erm<sup>s</sup>, erythromycin sensitive; Kan<sup>r</sup>, kanamycin resistance  
263  
264  
265  
266  
267

**Table S3. Primers used in this study.**

| Primers                         | Sequence (5' to 3')                                          | Purpose                                   |
|---------------------------------|--------------------------------------------------------------|-------------------------------------------|
| <i>psma</i> -pro-F              | CCGGAATTCCACTGCATAACCTCCTTATTTCTAA                           | for pCL- <i>psma</i> - <i>lacZ</i>        |
| <i>psma</i> -pro-R              | CGGGGTACCTAAGATTACCTCCTTTGCTTATGAGT                          |                                           |
| <i>vraX</i> -pro-F              | CCGGAATTCTGGATCACGGTGCATACAAC                                | for pCL- <i>vraX</i> - <i>lacZ</i>        |
| <i>vraX</i> -pro-R              | CGGGGTACCCCTATATTACCTCCTTTGCTACTCTAT                         |                                           |
| <i>luxABCDE</i> -F              | CCGGAATTCGAGCTCGAGCGCCACGTGATGAAGC<br>AAGAGGAGGACTCTC        | for pCL- <i>lux</i>                       |
| <i>luxABCDE</i> -R              | CGGGGTACCGTCGACTTAACTATCAAACGCT                              |                                           |
| <i>psma</i> -pro- <i>lux</i> -R | CCGCTCGAGCTTTGCTTATGAGTTAACTTCATTG                           | for pCL- <i>psma</i> - <i>lux</i>         |
| <i>vraX</i> -pro- <i>lux</i> -R | CCGCTCGAGCCTTTGCTACTCTATGGTTATATTATA<br>A                    | for pCL- <i>vraX</i> - <i>lux</i>         |
| <i>tarO</i> -up-F               | GGGGACAAGTTTGTACAAAAAAGCAGGCTGTGA<br>ATGACAACCTGAGAACTCTTC   | for pKOR1:: <i>tarO</i>                   |
| <i>tarO</i> -up-R               | CCATACAGCTATGCTTTCATTCTTATTCACCTTCAT<br>CGATATTAATTG         |                                           |
| <i>tarO</i> -down-F             | GGAATGAAAGCATAGCTGTATGG                                      |                                           |
| <i>tarO</i> -down-R             | GGGGACCACTTTGTACAAGAAAGCTGGGTGTCAC<br>ACTTAATGGCGCTATTTG     |                                           |
| <i>tarO</i> -F                  | ACAATTAATATCGATGAAGGTGAATAA                                  | for p- <i>tarO</i>                        |
| <i>tarO</i> -R                  | AGGGGGCCCCACAGCTATGCTTTCATTCCCTATT                           |                                           |
| <i>vraR</i> -up-F               | GGGGACAAGTTTGTACAAAAAAGCAGGCTATTGG<br>TTCAATGCTCATCTTAGTA    | for pKOR1:: <i>vraR</i>                   |
| <i>vraR</i> -up-R               | TCTTAATTCGATATGAACTATTGAATTAACCACAAA<br>CAATACTTTAATCGTCA    |                                           |
| <i>vraR</i> -down-F             | TTAATTCAATAGTTCATATCGAATTAAGA                                |                                           |
| <i>vraR</i> -down-R             | GGGGACCACTTTGTACAAGAAAGCTGGGTATGTT<br>GCTTTTCCTATTAACATTATTA |                                           |
| <i>vraR</i> -F                  | CCTTTAAATAAGGAGGATTTCGTATG                                   | for p- <i>vraR</i>                        |
| <i>vraR</i> -R                  | AGGGGGCCCTTCGATATGAACTATTGAATTAAATT<br>ATG                   |                                           |
| His- <i>vraR</i> -F             | CGCGGATCCATGACGATTAAAGTATTGTTTGTGG                           | for pET28a-His <sub>6</sub> - <i>vraR</i> |
| His- <i>vraR</i> -R             | CCGCTCGAGTTCGATATGAACTATTGAATTAAATTA<br>TG                   |                                           |
| <i>agrA</i> -up-F               | GGGGACAAGTTTGTACAAAAAAGCAGGCTGTATT<br>TTGTCAAATCAAATGGTATT   | for pKOR1:: <i>agrA</i>                   |
| <i>agrA</i> -up-R               | GCCGTAACTGACTTTATTATCTTAACATTACATCC<br>TTATGGCTAGTT          |                                           |
| <i>agrA</i> -down-F             | TAAGATAATAAAGTCAGTTAACGGC                                    |                                           |
| <i>agrA</i> -down-R             | GGGGACCACTTTGTACAAGAAAGCTGGGTAAACA<br>TTTACGAAGCAAATTGGT     |                                           |



|                       |                                                               |                                          |
|-----------------------|---------------------------------------------------------------|------------------------------------------|
| <i>spa</i> -up-F      | GGGGACAAGTTTGTACAAAAAAGCAGGCTAAGC<br>GTCGACTTTCTTAATTACA      | for pKOR1:: <i>spa</i>                   |
| <i>spa</i> -up-R      | TCTATCGTTGTGTATTGTTTCTGTATGTATTT<br>GTAAAGTCATCATAAT          |                                          |
| <i>spa</i> -down-F    | AAACAAACAATACACAACGATAGA                                      |                                          |
| <i>spa</i> -down-R    | GGGGACCACTTTGTACAAGAAAGCTGGGTATTG<br>ATACGTTTAACTTAAGTGGAG    |                                          |
| <i>mecA</i> -up-F     | GGGGACAAGTTTGTACAAAAAAGCAGGCTAAGA<br>ACTTTATGTCCCGGACTCAT     | for pKOR1:: <i>mecA</i>                  |
| <i>mecA</i> -up-R     | CTTTACCTGAGATTTTGGCATTGTCGACAACTACA<br>ACTATTAATAAAGTGG       |                                          |
| <i>mecA</i> -down-F   | ACAATGCCAAAATCTCAGGTAAAG                                      |                                          |
| <i>mecA</i> -down-R   | GGGGACCACTTTGTACAAGAAAGCTGGGTGTGC<br>GATTAATGTGATAATACAGTTACG |                                          |
| pYJ335-PCR-F          | GATATCCCCTTGGCGCGCCAAAGGGGGCCCCCTG<br>AATTCGGAGGCATATC        | for pYJ335-1                             |
| pYJ335-PCR-R          | GGGCCCCCTTGGCGCGCCAAGGGGATATCAAGC<br>TTATTTAATTATACTCTATCA    |                                          |
| EMSA- <i>spa</i> -F   | TATTACGCAAGTGTGCTGTATTCTA                                     | for EMSA of <i>spa</i>                   |
| EMSA- <i>spa</i> -R   | ATTAATACCCCCTGTATGTATTTGTAA                                   |                                          |
| EMSA- <i>vraX</i> -F  | GAAAATTTACATACATATCGAACAAATAC                                 | for EMSA of <i>vraX</i>                  |
| EMSA- <i>vraX</i> -R  | AACCTATATTACCTCCTTTGCTACTC                                    |                                          |
| EMSA- <i>vraRS</i> -F | GTCCGATTTTAACGACAAAG                                          | for EMSA of <i>vraRS</i>                 |
| EMSA- <i>vraRS</i> -R | TGAAATGACGCATTGATTGTG                                         |                                          |
| EMSA- <i>coa</i> -F   | GTGTTGTCATGCTTTGTTACTCC                                       | for EMSA of <i>coa</i>                   |
| EMSA- <i>coa</i> -R   | GCGCCTAGCGAAATTATTTGC                                         |                                          |
| FAM- <i>spa</i> -R    | FAM-ATTAATACCCCCTGTATGTATTTGTAA                               | for footprinting assay<br>of <i>spa</i>  |
| FAM- <i>vraX</i> -R   | FAM-AACCTATATTACCTCCTTTGCTACTC                                | for footprinting assay<br>of <i>vraX</i> |
| G152A-F               | GCAATTAACCTTAATTGATGCTCTCGATGGTTTGG                           | for p- <i>tarO</i> <sup>G152A</sup>      |
| G152A-R               | CCAAACCATCGAGAGCATCAATTAAGTTAATTGC                            |                                          |
| <i>spa</i> -RT-F      | GAAAAAGAAAAACATTTATTCAATTCTG                                  | for qRT-PCR of <i>spa</i>                |
| <i>spa</i> -RT-R      | AGGCATATTTAAGACTTGATAAAAAGC                                   |                                          |
| <i>psmA3</i> -RT-F    | GCCATTACATGGAATTCGT                                           | for qRT-PCR of <i>psmA3</i>              |
| <i>psmA3</i> -RT-R    | GATTAGTTGTTACCTAAAAATTTACCAAG                                 |                                          |
| <i>psmB1</i> -RT-F    | ATGGAAGGTTTATTTAACGCAAT                                       | for qRT-PCR of <i>psmB1</i>              |
| <i>psmB1</i> -RT-R    | AATCCGAATAATTTACCTAATAAACC                                    |                                          |
| RNAIII-RT-F           | GGAAGGAGTGATTTCAATGG                                          | for qRT-PCR of RNAIII                    |
| RNAIII-RT-R           | TTCACTGTGTCGATAATCCA                                          |                                          |
| <i>vraX</i> -RT-F     | ATGATTATTTATCGACAGTATCACCAT                                   | for qRT-PCR of <i>vraX</i>               |
| <i>vraX</i> -RT-R     | AGAGCAATTTGAATATTTCAAGTATCAC                                  |                                          |
| <i>pbp2</i> -RT-F     | GATTTAACTTAGCGGAAGAAGC                                        | for qRT-PCR of <i>pbp2</i>               |

|                      |                                                     |                              |
|----------------------|-----------------------------------------------------|------------------------------|
| <i>pbp2</i> -RT-R    | TGTTTTTACGATCTTCAGCAGC                              |                              |
| <i>saeR</i> -RT-F    | CACTTACTGATCGTGGATGATGA                             | for qRT-PCR of <i>saeR</i>   |
| <i>saeR</i> -RT-R    | ATCATTTGATAGTAAAGAAATTGCTTC                         |                              |
| <i>saeS</i> -RT-F    | TAGAAGTCAAATCATTATTGGCGT                            | for qRT-PCR of <i>saeS</i>   |
| <i>saeS</i> -RT-R    | CAGCTTGTAATTATTGTCGTTAAGG                           |                              |
| <i>pmtA</i> -RT-F    | GAATGCCATAGAATTAAGTAATGTT                           | for qRT-PCR of <i>pmtA</i>   |
| <i>pmtA</i> -RT-R    | CTTATTATTGTGGTTTTACCAGCG                            |                              |
| 16S-RT-F             | GGCAAGCGTTATCCGGAATT                                | for qRT-PCR of 16S rRNA      |
| 16S-RT-R             | GTTTCCAATGACCCTCCACG                                |                              |
| <i>Pspac-pbp2</i> -F | CCCAAGCTTGATGAAAGTGAGGACCGCGT                       | for pMutin-HA- <i>pbp2</i> ' |
| <i>Pspac-pbp2</i> -R | GCGGGTACCATACTTAGCAGCAGCTTTAATACCTG                 |                              |
| <i>gfp</i> -F        | GATGAAAGTGAGGACCGCGTATGTCAAAAGGAG<br>AAGAATTATTTAC  | for p- <i>gfp-pbp2</i>       |
| <i>gfp</i> -R        | TGAGAAGATCCTTTGTTTTCCGTCTTATATAATTCAT<br>CCATTCCGTG |                              |
| <i>pbp2</i> -F       | ACGGAACAAAGGATCTTCTCA                               | for pMutin-HA- <i>pbp2</i> ' |
| <i>pbp2</i> -R       | AGGGGGCCCCAGTGGATTAGTTGAATATACCTGTTA<br>ATC         |                              |
| <i>sgtB</i> -F       | TTAAAAGAAGGAGCAAACGCAT                              | for p- <i>sgtB</i>           |
| <i>sgtB</i> -R       | ATGCAAGTATTTAACGATTTAATTGTG                         |                              |
| <i>mecA</i> -F       | CTACAAATGTAGTCTTATATAAGGAGTATATTG                   | for p- <i>mecA</i>           |
| <i>mecA</i> -R       | TTACGGATTGCTTCACTGTTTT                              |                              |
| <i>murJ</i> -F       | AATTAAAATAAGCTTATGAGATAGGGAGATTCGTA                 | for p- <i>murJ</i>           |
| <i>murJ</i> -R       | TATGCCTCCGAATTCTCATCGTAAAAACCTAACTC                 |                              |
| <i>agrA</i> -F       | CAACTAGCCATAAGGATGTGAATG                            | for p- <i>agrA</i>           |
| <i>agrA</i> -R       | AGGGGGCCCCGCGTTAACTGACTTTATTATCTTATT<br>A           |                              |

## SI References

1. Sun F, *et al.* (2010) In the *Staphylococcus aureus* two-component system *sae*, the response regulator SaeR binds to a direct repeat sequence and DNA binding requires phosphorylation by the sensor kinase SaeS. *J Bacteriol* 192(8):2111-2127.
2. Ji Y, Marra A, Rosenberg M, & Woodnutt G (1999) Regulated antisense RNA eliminates alpha-toxin virulence in *Staphylococcus aureus* infection. *J Bacteriol* 181(21):6585-6590.
3. Bae T & Schneewind O (2006) Allelic replacement in *Staphylococcus aureus* with inducible counter-selection. *Plasmid* 55(1):58-63.
4. Grundling A & Schneewind O (2007) Synthesis of glycerol phosphate lipoteichoic acid in *Staphylococcus aureus*. *Proceedings of the National Academy of Sciences of the United States of America* 104(20):8478-8483.
5. Kreiswirth BN, *et al.* (1983) The toxic shock syndrome exotoxin structural gene is not detectably transmitted by a prophage. *Nature* 305(5936):709-712.
6. Bubeck Wardenburg J & Schneewind O (2008) Vaccine protection against *Staphylococcus aureus* pneumonia. *The Journal of experimental medicine* 205(2):287-294.

- 285 7. Li M, *et al.* (2016) Increased Community-Associated Infections Caused by Pantón-  
286 Valentine Leukocidin-Negative MRSA, Shanghai, 2005-2014. *Emerg Infect Dis*  
287 22(11):1988-1991.
- 288 8. Fey PD, *et al.* (2013) A genetic resource for rapid and comprehensive phenotype screening  
289 of nonessential *Staphylococcus aureus* genes. *mBio* 4(1):e00537-00512.
- 290
